# Supplementary material for: Persistent Organic Pollutant Levels in Maternal and Cord Blood Plasma and Breast Milk: Results from the Rio Birth Cohort Pilot Study of Environmental Exposure and Childhood Development (PIPA Study)
Source: MDPI journal article supplement (doi:10.3390/ijerph20010778), 2022-12-31
Supplement: s1 [file s1]

**Persistent organic pollutant levels in maternal, cord blood plasma and breast milk:  
Results from the Rio Birth Cohort Pilot Study of Environmental Exposure and Childhood  
Development (PIPA Study)**

**Supplemental Material**

**Table S1.** Calibration parameters and limits for OCs and PCBs.

| <b>Organochlorine and PCB</b> | <b>Slope</b> | <b>Linear Coefficient</b> | <b>Linearity</b> | <b>Recovery (%)</b> | <b>LOQ<br/>ng mL<sup>-1</sup></b> | <b>LOD<br/>ng mL<sup>-1</sup></b> |
|-------------------------------|--------------|---------------------------|------------------|---------------------|-----------------------------------|-----------------------------------|
| 2,4'-DDD                      | 164424       | -105963                   | 0.9847           | 102                 | 0.189                             | 0.063                             |
| 2,4'-DDE                      | 133466       | -104848                   | 0.9824           | 102                 | 0.201                             | 0.066                             |
| 2,4'-DDT                      | 206667       | -144347                   | 0.9658           | 105                 | 0.063                             | 0.021                             |
| 4,4'-DDD                      | 212082       | 6675                      | 0.936            | 101                 | 0.09                              | 0.03                              |
| 4,4'-DDE                      | 111655       | -33095                    | 0.9736           | 99                  | 0.205                             | 0.068                             |
| 4,4'-DDT                      | 205722       | -229041                   | 0.9562           | 102                 | 0.145                             | 0.048                             |
| Aldrin                        | 4576         | -8718                     | 0.9854           | 99                  | 0.818                             | 0.27                              |
| alfa-Chlordane                | 11662        | -14012                    | 0.9787           | 97                  | 0.715                             | 0.236                             |
| alfa-Endosulfan               | 5767         | -9126                     | 0.9631           | 105                 | 1.125                             | 0.371                             |
| alfa-HCH                      | 92536        | -70174                    | 0.9832           | 94                  | 0.201                             | 0.066                             |
| beta-Endosulfan               | 5994         | -7198                     | 0.9946           | 101                 | 0.619                             | 0.204                             |
| beta-HCH                      | 58035        | -39473                    | 0.9865           | 97                  | 0.053                             | 0.017                             |
| delta-HCH                     | 30644        | -25637                    | 0.9838           | 97                  | 0.172                             | 0.057                             |
| Dicofol                       | 89022        | -93845                    | 0.9921           | 94                  | 0.101                             | 0.033                             |
| Dieldrin                      | 7141         | -14131                    | 0.988            | 103                 | 0.476                             | 0.157                             |
| Endosulfan sulfate            | 29623        | -31105                    | 0.962            | 102                 | 1.009                             | 0.333                             |
| Endrin                        | 7571         | -13910                    | 0.9906           | 96                  | 0.734                             | 0.242                             |
| gama-Chlordane                | 10049        | -16507                    | 0.9634           | 93                  | 1.419                             | 0.468                             |
| gama-HCH                      | 39580        | -27352                    | 0.9833           | 96                  | 0.212                             | 0.07                              |
| Heptachlor                    | 32598        | -27788                    | 0.9783           | 96                  | 0.162                             | 0.053                             |
| Heptachlor epoxide            | 8442         | -14194                    | 0.9808           | 99                  | 1.189                             | 0.392                             |
| Hexachlorobenzene             | 278528       | -48803                    | 0.983            | 94                  | 0.045                             | 0.015                             |
| Metoxichlor                   | 99450        | -96189                    | 0.9648           | 99                  | 0.159                             | 0.052                             |
| Mirex                         | 74864        | -68552                    | 0.9764           | 101                 | 0.149                             | 0.049                             |
| Pentachloroanisole            | 96295        | -92860                    | 0.9726           | 95                  | 0.143                             | 0.047                             |
| trans-Nonachlor               | 5848         | -7051                     | 0.9825           | 103                 | 0.64                              | 0.21                              |
| PCB 28                        | 274097       | -134898                   | 0.9774           | 95                  | 0.19                              | 0.06                              |
| PCB 31                        | 484003       | -637790                   | 0.9656           | 94                  | 0.17                              | 0.06                              |
| PCB 52                        | 124862       | -37259                    | 0.9731           | 95                  | 0.19                              | 0.06                              |
| PCB 77                        | 68743        | -178717                   | 0.9412           | 99                  | 0.25                              | 0.08                              |
| PCB 101                       | 35008        | -95681                    | 0.9525           | 96                  | 0.25                              | 0.08                              |
| PCB 105                       | 44770        | -78194                    | 0.9452           | 100                 | 0.24                              | 0.08                              |
| PCB 118                       | 52787        | -83860                    | 0.9652           | 98                  | 0.19                              | 0.06                              |

|         |       |         |        |     |      |      |
|---------|-------|---------|--------|-----|------|------|
| PCB 126 | 33000 | -72587  | 0.9587 | 87  | 0.19 | 0.06 |
| PCB 128 | 10601 | -18607  | 0.9674 | 99  | 0.27 | 0.09 |
| PCB 138 | 24033 | -70547  | 0.9461 | 97  | 0.3  | 0.1  |
| PCB 153 | 42680 | -36395  | 0.9583 | 109 | 0.05 | 0.02 |
| PCB 156 | 6723  | -40544  | 0.9481 | 107 | 0.17 | 0.06 |
| PCB 169 | 6078  | -348809 | 0.9552 | 99  | 1.08 | 0.36 |
| PCB 170 | 9318  | -27753  | 0.9458 | 95  | 0.96 | 0.32 |
| PCB 180 | 65180 | -34198  | 0.9886 | 94  | 0.2  | 0.07 |

**Table S2.** Estimated HQ from breast milk described in the literature.

| Country     | Estimated HQ                                                                                                                                                                                                                                                    | Situation                                           | Reference |
|-------------|-----------------------------------------------------------------------------------------------------------------------------------------------------------------------------------------------------------------------------------------------------------------|-----------------------------------------------------|-----------|
| Brazil      | Mean <sup>a</sup><br>0.28 <sup>b</sup><br>0.14 <sup>c</sup><br>Highest value <sup>a</sup><br>104.85 <sup>b</sup><br>52.43 <sup>c</sup>                                                                                                                          | Riverine mothers                                    | [22]      |
| Brazil      | 3.14x10 <sup>-4</sup>                                                                                                                                                                                                                                           | Mothers from urban area and countryside             | [23]      |
| Ethiopia    | Mean <sup>a</sup><br>58.80 <sup>b</sup><br>29.40 <sup>c</sup>                                                                                                                                                                                                   | Mothers from subsistence farming areas              | [21]      |
| India       | Mean <sup>a</sup><br>21.44 <sup>b</sup><br>10.72 <sup>c</sup>                                                                                                                                                                                                   | Mothers from rural and urban areas                  | [54]      |
| Poland      | Primipara mothers<br>Mean<br>0.30 <sup>b</sup><br>0.15 <sup>c</sup><br>Highest Value<br>2.5 <sup>b</sup><br>1.23 <sup>c</sup><br>Multipara mothers<br>Mean<br>0.34 <sup>b</sup><br>0.17 <sup>c</sup><br>Highest Value<br>3.20 <sup>b</sup><br>1.60 <sup>c</sup> | Primipara and multipara mothers                     | [55]      |
| Turkey      | Van<br>Mean<br>25.32 <sup>b</sup><br>12.66 <sup>c</sup><br>Manisa<br>Mean<br>24.08 <sup>b</sup><br>12.04 <sup>c</sup>                                                                                                                                           | Mothers living in Van and Manisa                    | [56]      |
| USA         | 28 <sup>b</sup><br>14 <sup>c</sup>                                                                                                                                                                                                                              | Mothers from Pitt, Durham, and Wake, North Carolina | [57]      |
| New Zealand | North region<br>12.32<br>South region<br>6.16                                                                                                                                                                                                                   | Mothers from Auckland and Christchurch              | [58]      |

<sup>a</sup> Adjusted by 4% of lipid; <sup>b</sup> IRIS EPA estimation; <sup>c</sup> FAO/WHO estimation
